# Supplementary material for: ERCC1-expressing circulating tumor cells as a potential diagnostic tool for monitoring response to platinum-based chemotherapy and for predicting post-therapeutic outcome of ovarian cancer
Source: PubMed Central journal article supplement (PMC5421848; doi:10.18632/oncotarget.13286), 2016-11-11
Supplement: oncotarget-08-24303-s001.pdf [file oncotarget-08-24303-s001.pdf]

## ERCC1-expressing circulating tumor cells as a potential diagnostic tool for monitoring response to platinum-based chemotherapy and for predicting post-therapeutic outcome of ovarian cancer

### SUPPLEMENTARY FIGURES AND TABLE

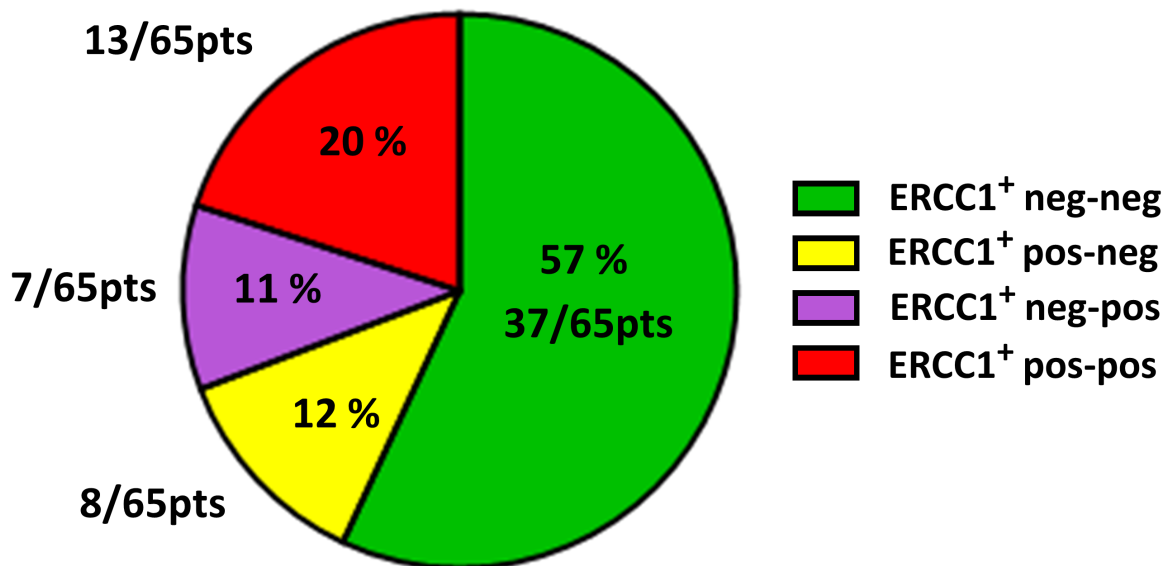

**Supplementary Figure S1: Dynamics of ERCC1-positivity in the course of platinum-based chemotherapy.** This analysis refers to the prognostic relevance of ERCC1-transcripts alone, irrespectively of the Adnatest transcript markers EpCAM, MUC-1 or CA-125. The pie chart shows a stratification of the study cohort (n=65) into different subgroups, according to the dynamics of ERCC1-positivity (ERCC1<sup>+</sup>) before surgery and after chemotherapy. Beside the group of patients, who were negative for ERCC1 throughout treatment (ERCC1<sup>+</sup> neg-neg), we observed patients, who became negative after chemotherapy (ERCC1<sup>+</sup> pos-neg), patients with newly acquires positivity after chemotherapy (ERCC1<sup>+</sup> neg-pos) or persistently positive patients (ERCC1<sup>+</sup> pos-pos). Percentages and absolute patient numbers are indicated.

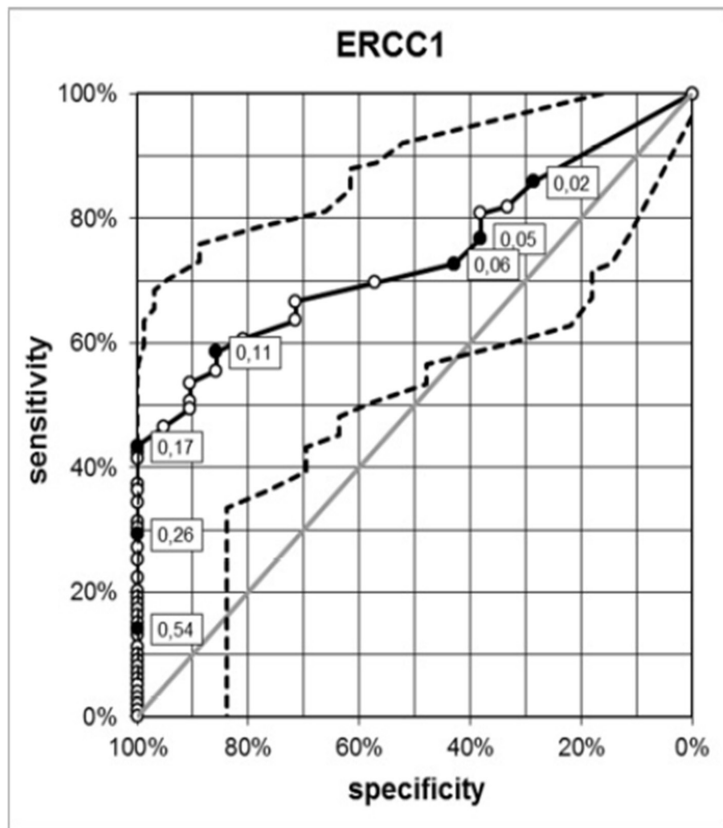

| N (normal)     | N (abnormal) |
|----------------|--------------|
| 21             | 99           |
| ROC CURVE P1   |              |
| AUC            | 0,7367       |
| SE             | 0,0528       |
| low. CI (0,95) | 0,6483       |
| upp. CI (0,95) | 0,8130       |
|                |              |
| SPEC           | SENS         |
| 95%            | 46,5%        |
| 90%            | 53,5%        |
| 80%            | 60,6%        |
| SENS           | SPEC         |
| 95%            | 0,0%         |
| 90%            | 0,0%         |
| 80%            | 38,1%        |

**Supplementary Figure S2: ROC analysis for the determination of ERCC1 sensitivity and specificity.** Blood samples of 20 healthy donors and 99 patients with primary ovarian cancer were analyzed for CTCs with the AdnaTest *OvarianCancer* and for ERCC1 expression applying densitometric fragment quantification using the Agilent Bioanalyzer 2100. The resulting data were checked for sensitivity and specificity. A cut off value was determined using a ROC analysis. At a cut-off value of 0.17 ng/μl 95% specificity was reached and the corresponding clinical sensitivity was 46.5%. A slightly higher cut-off at 0.2 ng/μl was, however, chosen as kind of a security measure.

Supplementary Table S1: Univariate analysis of different CTC-subgroups and patient numbers at risk

|                                       | at risk (%) |    |    |    |     | p-value (log rank) |
|---------------------------------------|-------------|----|----|----|-----|--------------------|
|                                       | 0           | 25 | 50 | 75 | 100 |                    |
| <b>1. PFS</b>                         |             |    |    |    |     |                    |
| <b>ERCC-1 after chemotherapy</b>      |             |    |    |    |     | <b>0.0158</b>      |
| no                                    | 45          | 25 | 12 | 4  | 2   |                    |
| yes                                   | 20          | 7  | 3  | 3  | 0   |                    |
| <b>ERCC-1</b>                         |             |    |    |    |     |                    |
| pos-pos                               | 13          | 3  | 1  | 1  | 0   | <b>0.0021</b>      |
| neg-neg or pos-neg or neg-pos         | 52          | 29 | 14 | 6  | 2   |                    |
| <b>ERCC-1+CTCs after chemotherapy</b> |             |    |    |    |     | <b>0.0293</b>      |
| no                                    | 57          | 30 | 14 | 6  | 2   |                    |
| yes                                   | 8           | 2  | 1  | 1  | 0   |                    |
| <b>ERCC-1+CTCs</b>                    |             |    |    |    |     |                    |
| pos-pos                               | 3           | 0  | 0  | 0  | 0   | <b>0.0053</b>      |
| neg-neg or pos-neg or neg-pos         | 62          | 32 | 15 | 7  | 2   |                    |
| <b>ERCC-1+CTCs</b>                    |             |    |    |    |     |                    |
| neg-pos                               | 5           | 2  | 1  | 1  | 0   | 0.2871             |
| neg-neg or pos-neg                    | 57          | 30 | 14 | 6  | 2   |                    |
|                                       |             |    |    |    |     |                    |
|                                       | at risk (%) |    |    |    |     | p-value(log rank)  |
|                                       | 0           | 25 | 50 | 75 | 100 |                    |
| <b>2. OS</b>                          |             |    |    |    |     |                    |
| <b>ERCC-1 after chemotherapy</b>      |             |    |    |    |     | <b>0.0377</b>      |
| no                                    | 45          | 31 | 17 | 8  | 5   |                    |
| yes                                   | 20          | 16 | 5  | 5  | 1   |                    |
| <b>ERCC-1</b>                         |             |    |    |    |     |                    |
| pos-pos                               | 13          | 10 | 3  | 3  | 1   | <b>0.0327</b>      |
| neg-neg or pos-neg or neg-pos         | 52          | 37 | 19 | 10 | 5   |                    |
| <b>ERCC-1+CTCs after chemotherapy</b> |             |    |    |    |     | <b>0.0008</b>      |
| no                                    | 57          | 41 | 21 | 12 | 6   |                    |
| yes                                   | 8           | 6  | 1  | 1  | 0   |                    |
| <b>ERCC-1+CTCs</b>                    |             |    |    |    |     |                    |
| pos-pos                               | 3           | 2  | 0  | 0  | 0   | <b>0.0058</b>      |
| neg-neg or pos-neg or neg-pos         | 62          | 45 | 22 | 13 | 6   |                    |
| <b>ERCC-1+CTCs</b>                    |             |    |    |    |     |                    |
| neg-pos                               | 5           | 4  | 1  | 1  | 0   | <b>0.0202</b>      |
| neg-neg or pos-neg                    | 57          | 41 | 21 | 12 | 6   |                    |

The table summarizes univariate analysis according to the Kaplan-Meier curves (Figure 2, 4, 5). The absolute number of patients in each subgroup at a risk of 0%, 25%, 50%, 75% and 100% is indicated for each case.
